# Supplementary material for: Effect of Aging, Gender and Sensory Stimulation of TRPV1 Receptors with Capsaicin on Spontaneous Swallowing Frequency in Patients with Oropharyngeal Dysphagia: A Proof-of-Concept Study
Source: PubMed Central journal article supplement (PMC7999082; doi:10.3390/diagnostics11030461), 2021-03-07
Supplement: diagnostics-11-00461-s001.pdf [file diagnostics-11-00461-s001.pdf]

Article

# Effect of Aging, Gender and Sensory Stimulation of TRPV1 Receptors with Capsaicin on Spontaneous Swallowing Frequency in Patients with Oropharyngeal Dysphagia: A Proof-of-Concept Study

Supplementary Materials

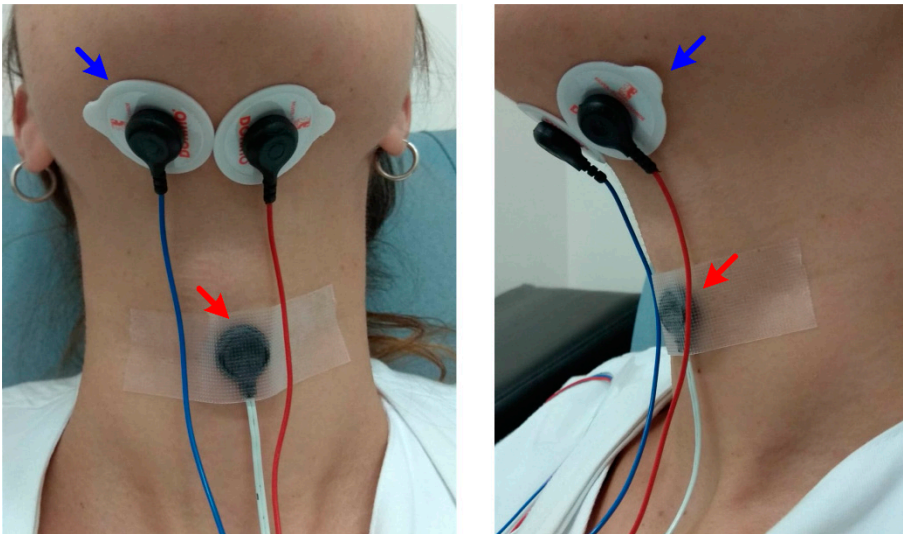

Figure S1. Placement of the electrodes (blue arrow) and accelerometer (red arrow).

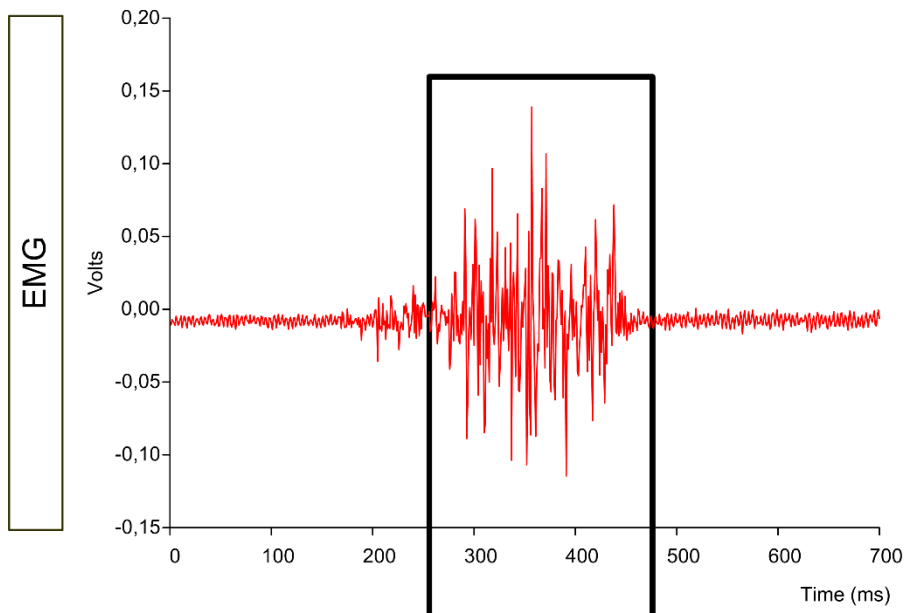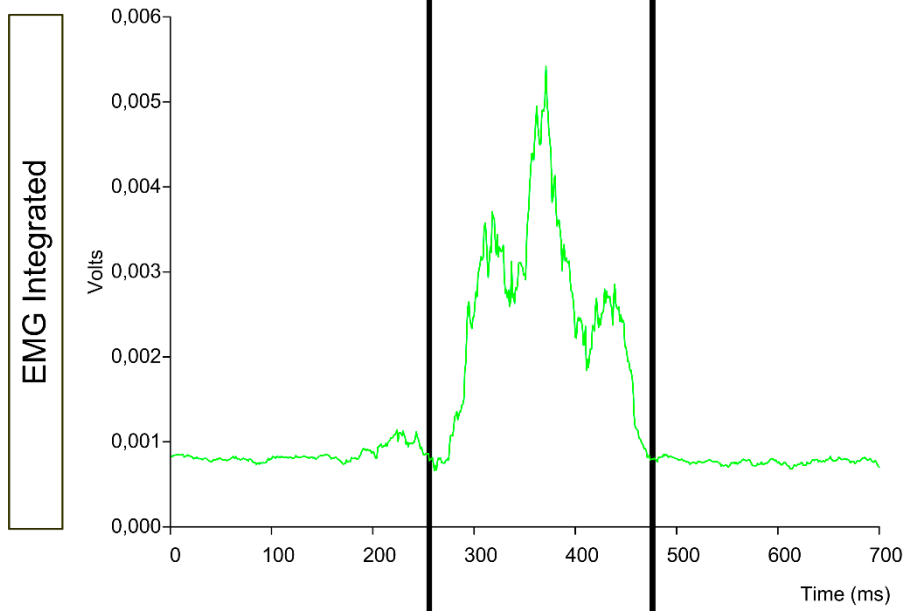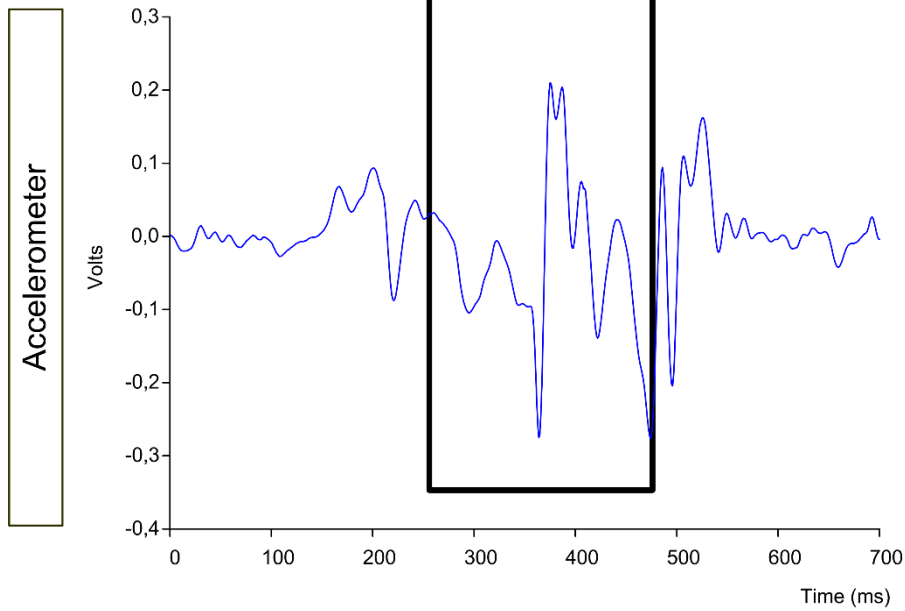

Figure S2. Example of a swallowing signal. The EMG signal is shown in red, the EMG integrated in green and the accelerometer in blue. EMG: electromyography.
